# Supplementary material for: Two MADS-box genes regulate vascular cambium activity and secondary growth by modulating auxin homeostasis in Populus
Source: PubMed Central journal article supplement — Plant Commun. 2020 Nov 23;2(5):100134. doi: 10.1016/j.xplc.2020.100134 (PMC8553971; doi:10.1016/j.xplc.2020.100134), 2020-11-23
Supplement: mmc1.pdf [file mmc1.pdf]

**Plant Communications, Volume 2**

**Supplemental information**

**Two MADS-box genes regulate vascular cambium activity and secondary growth by modulating auxin homeostasis in *Populus***

**Shuai Zheng, Jiajia He, Zengshun Lin, Yingying Zhu, Jiayan Sun, and Laigeng Li**

## Supplemental Figures

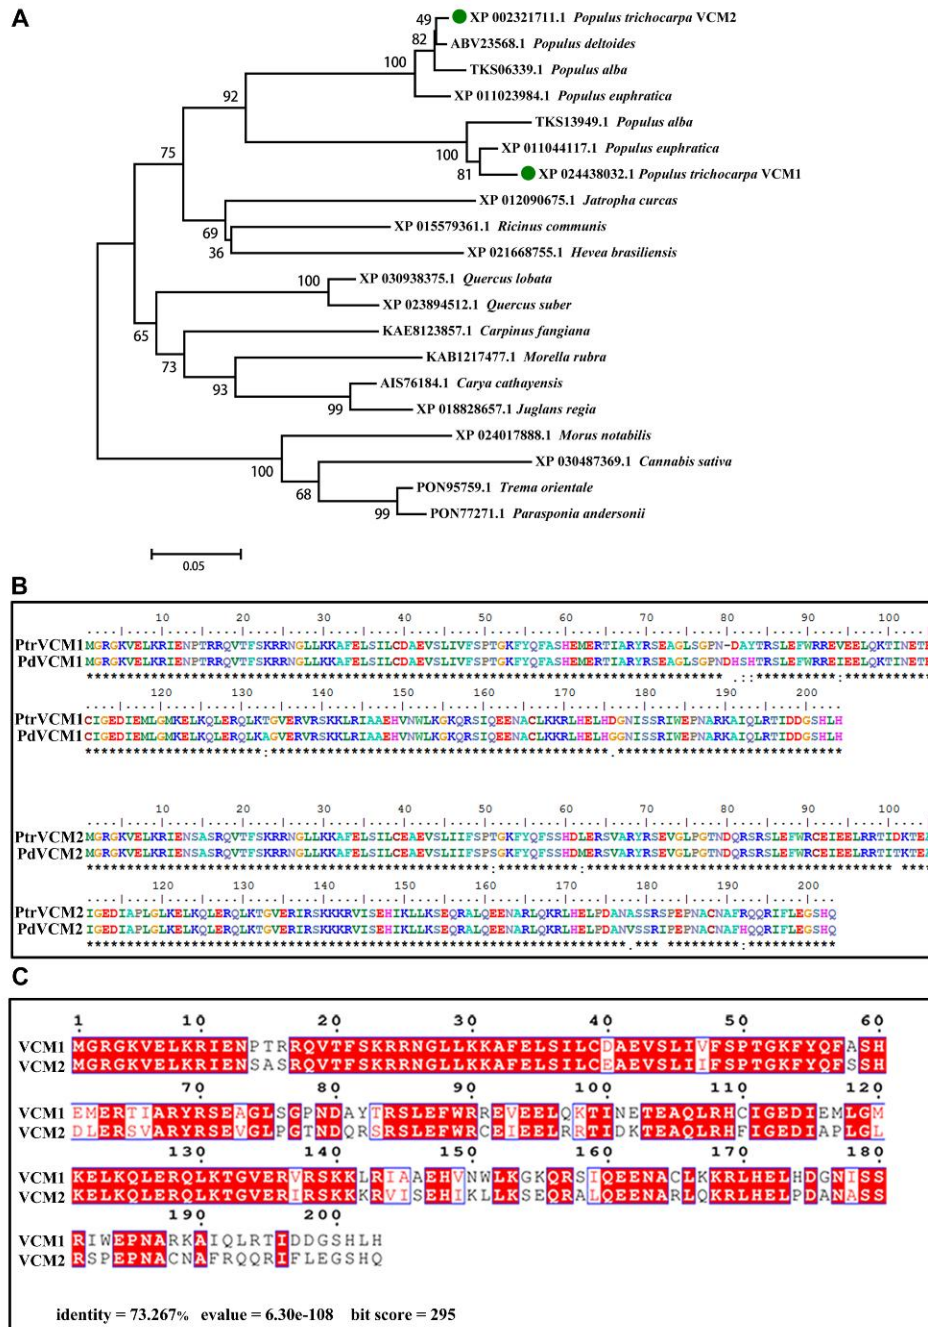

**Figure S1. Phylogenetic analysis of VCM1 and VCM2.**

(A) A neighbor joining tree of VCM1 and VCM2 and their homologs in various woody plant species. N. bootstrap = 1000. (B) VCM1 and VCM2 protein sequences from *Populus trichocarpa* and *Populus deltoides* × *P. euramericana* cv. 'Nanlin895'. (C) Similarity of VCM1 and VCM2 protein sequences.

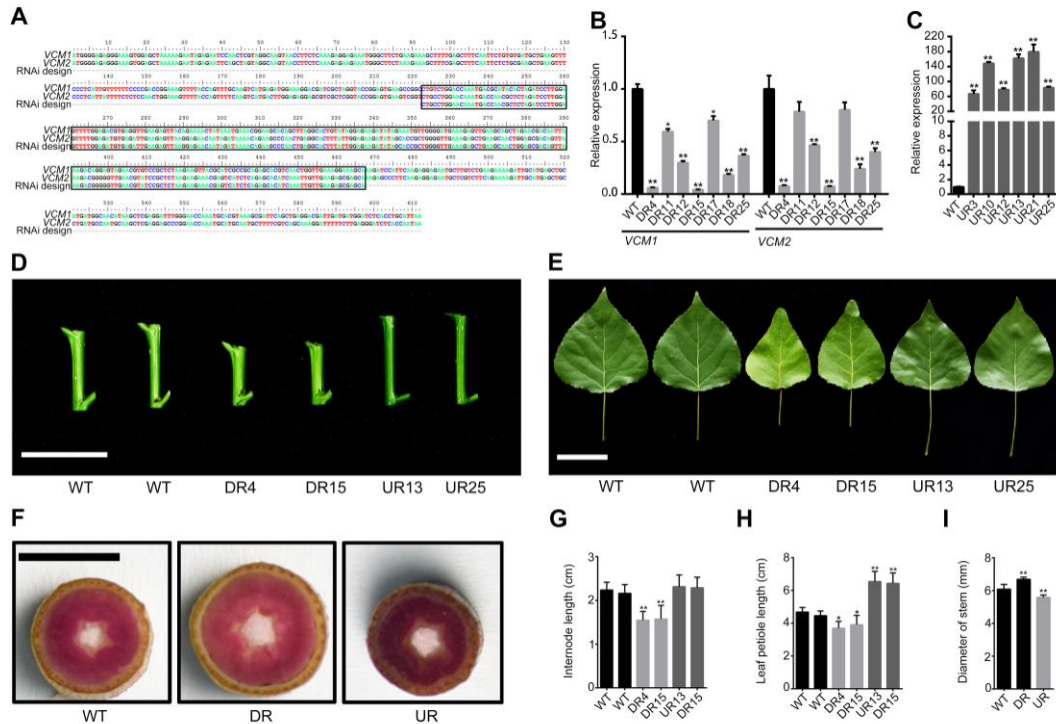

**Figure S2. Regulation of *VCM1* and *VCM2* in *Populus*.**

(A) RNAi fragment for downregulation of *VCM1* & *VCM2*. (B) A variety of *VCM1* & *VCM2* suppression in *DR* transgenics. (C) Expression of *VCM1* in *UR* transgenics. Values are means  $\pm$ SD (n = 3 biological replicates). (D) The 10<sup>th</sup> internode of WT and transgenic, Scale bar = 2.5 cm. (E) Mature leaf from WT and transgenic, Scale bar = 5 cm. (F) Cross section of WT and transgenic, the position is 45 cm from the base in stem and plants were growth for more than five months. (G) Internode length (n = 10). (H) Leaf petiole length (n = 10). (I) Stem diameter (n = 50). Statistical significance of differences was calculated based on two-tailed, two-sample student's t-test (\*\*P < 0.01, \* P < 0.05).

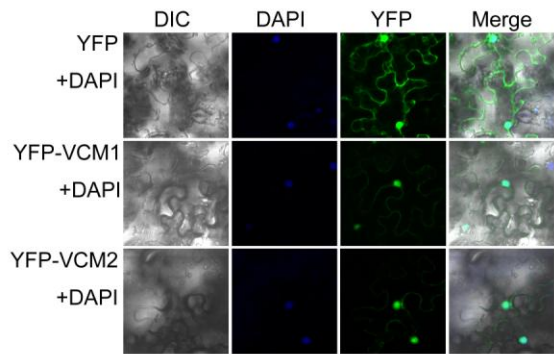

**Figure S3.** Subcellular localization of VCM1 and VCM2 in nucleus.

Localization of VCM1 and VCM2 was examined in tobacco leaf epidermal cells. YFP was fused with VCM1 or VCM2 to form YFP-VCM1 or YFP-VCM2. DAPI is used as a nucleus marker.

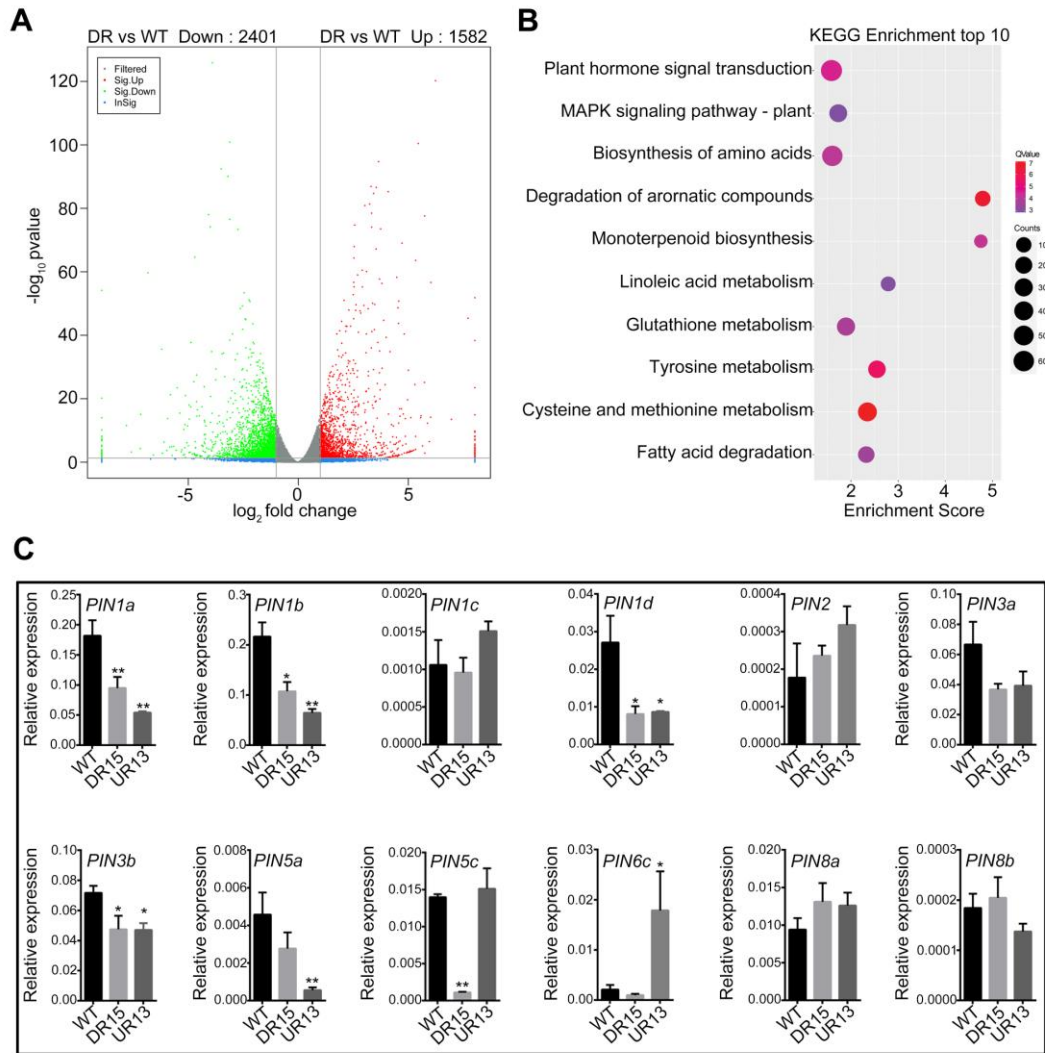

**Figure S4. Differently expressed genes in downregulation of *VCM1* & *VCM2*.**  
 (A) The transcriptome was substantially changed in downregulation of *VCM1* & *VCM2*.  
 (B) KEGG enrichment shows the top 10 biological processes changed in the transcriptome.  
 (C) qRT-PCR analysis of the *PIN* genes expression in regulation of *VCM1* & *VCM2*. Values are means  $\pm$  SD (n = 3 biological replicates). Statistical significance of differences was calculated based on two-tailed, two-sample student's t-test (\*\*P < 0.01, \* P < 0.05).
